# Supplementary material for: Photosynthesis-Related Responses of Colombian Elite Hevea brasiliensis Genotypes under Different Environmental Variations: Implications for New Germplasm Selection in the Amazon
Source: MDPI journal article supplement (doi:10.3390/plants10112320), 2021-10-28
Supplement: s1 [file s1]

## Supplementary Materials

# Photosynthesis-related responses of Colombian elite *Hevea brasiliensis* genotypes under different environmental variations: implications for new germplasm selection in the Amazon

Armando Sterling<sup>1,\*</sup>, Lised Guaca-Cruz<sup>1,2</sup>, Edwin Andrés Clavijo-Arias<sup>1</sup>, Natalia Rodríguez-Castillo<sup>1</sup> and Juan Carlos Suárez<sup>3</sup>

<sup>1</sup> Laboratorio de Fitopatología, Instituto Amazónico de Investigaciones Científicas Sinchi – Facultad de Ciencias Básicas - Universidad de la Amazonía, Florencia, Caquetá, 180001, Colombia; lisguacacruz@gmail.com (L.G.-C); andresclavijoarias@gmail.com (E.A.C.-A.); narodriguezc16@gmail.com (N.R.-C.)

<sup>2</sup> Programa Doctorado en Ciencias Naturales y Desarrollo Sustentable, Facultad de Ciencias Agropecuarias, Universidad de la Amazonía, Florencia, Caquetá, Colombia

<sup>3</sup> Laboratorio de Ecofisiología, Universidad de la Amazonia, Facultad de Ingeniería, Programa de Ingeniería Agroecológica. Florencia, Caquetá, 180001, Colombia; ju.suarez@udla.edu.co (J.C.S.)

\* Correspondence: asterling@sinchi.org.co (A.S.); Tel.: +57-3107862496 (A.S.)

## Supplementary Tables

**Table S1.** Mean and standard error values for the soil volumetric water content (VWC), soil water potential ( $\Psi_s$ ) and soil temperature (ST).

| Site            | Period | Hour  | VWC (%)      | $\Psi_s$ (MPa)  | ST (°C)      |
|-----------------|--------|-------|--------------|-----------------|--------------|
| Humid warm      | Rainy  | 3:00  | 38.66 ± 0.58 | -0.009 ± 0.0002 | 27.48 ± 0.06 |
|                 |        | 6:00  | 38.29 ± 0.58 | -0.010 ± 0.0002 | 27.47 ± 0.06 |
|                 |        | 9:00  | 40.02 ± 0.60 | -0.011 ± 0.0002 | 27.41 ± 0.05 |
|                 |        | 12:00 | 39.20 ± 0.60 | -0.011 ± 0.0002 | 27.39 ± 0.06 |
|                 |        | 15:00 | 37.23 ± 0.50 | -0.010 ± 0.0011 | 27.83 ± 0.10 |
|                 |        | 18:00 | 39.04 ± 0.94 | -0.010 ± 0.0002 | 28.26 ± 0.12 |
|                 | Dry    | 3:00  | 39.40 ± 0.56 | -0.010 ± 0.0067 | 28.52 ± 0.16 |
|                 |        | 6:00  | 38.63 ± 0.61 | -0.011 ± 0.0067 | 28.09 ± 0.23 |
|                 |        | 9:00  | 39.18 ± 0.60 | -0.012 ± 0.0002 | 27.51 ± 0.18 |
|                 |        | 12:00 | 36.10 ± 0.48 | -0.020 ± 0.0002 | 27.59 ± 0.11 |
|                 |        | 15:00 | 37.40 ± 0.54 | -0.011 ± 0.0002 | 27.85 ± 0.09 |
|                 |        | 18:00 | 36.50 ± 0.50 | -0.010 ± 0.0002 | 28.16 ± 0.09 |
| Semi-humid warm | Rainy  | 3:00  | 37.84 ± 0.61 | -0.010 ± 0.0002 | 27.07 ± 0.12 |
|                 |        | 6:00  | 39.12 ± 0.52 | -0.010 ± 0.0002 | 26.93 ± 0.10 |
|                 |        | 9:00  | 39.42 ± 0.40 | -0.011 ± 0.0002 | 26.53 ± 0.09 |
|                 |        | 12:00 | 37.08 ± 0.57 | -0.011 ± 0.0002 | 26.52 ± 0.09 |
|                 |        | 15:00 | 38.67 ± 0.44 | -0.010 ± 0.0002 | 26.90 ± 0.09 |
|                 |        | 18:00 | 38.45 ± 0.41 | -0.010 ± 0.0002 | 26.89 ± 0.08 |
|                 | Dry    | 3:00  | 35.58 ± 0.65 | -0.028 ± 0.0028 | 27.04 ± 0.54 |
|                 |        | 6:00  | 35.53 ± 0.63 | -0.032 ± 0.0027 | 27.11 ± 0.11 |
|                 |        | 9:00  | 35.35 ± 0.67 | -0.034 ± 0.0025 | 27.81 ± 0.09 |
|                 |        | 12:00 | 34.05 ± 0.67 | -0.036 ± 0.0024 | 28.17 ± 0.07 |
|                 |        | 15:00 | 35.36 ± 0.72 | -0.035 ± 0.0026 | 27.14 ± 0.10 |
|                 |        | 18:00 | 35.37 ± 0.73 | -0.033 ± 0.0027 | 27.08 ± 0.13 |
